# Supplementary material
Source: PubMed Central journal article supplement (PMC8096491)
Supplement: web_material_kwaa232.pdf [file web_material_kwaa232.pdf]

# **WEB MATERIAL**

## **Simulation as a Tool for Teaching and Learning Epidemiologic Methods**

Jacqueline E. Rudolph, Matthew P. Fox, and Ashley I. Naimi

Table of Contents

Web Appendix: Software Code

## WEB APPENDIX Software Code

Below, we include the code that can be used to carry out the examples discussed in the main text and above. These R programs can also be found on GitHub.

### Non-differential misclassification

```
#####  
#  
# Purpose: To demonstrate one way to simulate non-differential misclassification (NDM) scenarios and  
#         to estimate bias under those scenarios  
#  
# Author: Jacqueline E. Rudolph  
#  
# Required packages: ggplot2, tidyverse  
#  
# Last Updated: 15 Oct 2020  
#  
#####  
  
##Load in necessary packages  
  
packages <- c("tidyverse" ,"ggplot2")  
for (package in packages) {  
  library(package, character.only=T)  
}  
  
##Set up data set to store results
```

```
results <- data.frame(  
  rep=NA,  
  delta1=NA,  
  delta2=NA,  
  delta3=NA,  
  delta4=NA,  
  delta5=NA,  
  stringsAsFactors = FALSE  
)
```

```
# Run simulation -----
```

```
reps <- 10000 #The number of simulations  
n <- 1000 #Sample size within each simulation
```

```
#We carry out the simulations using the following function  
simloop <- function(r, n) {
```

```
  set.seed(r)  
  results$rep <- r
```

```
  #Create 2 continuous confounders (M1 and M2)  
  #Both are log normally distributed: the corresponding normal distributions have mean 0 and s.d. 1  
  m1 <- rlnorm(n, meanlog=0, sdlog=1)  
  m2 <- rlnorm(n, meanlog=0, sdlog=1)
```

```
  #Create binary exposure, P(A=1)=0.5  
  #A affected by M1 and M2: both with log(OR) of log(2)  
  a <- rbinom(n, 1, 1/(1 + exp(-(-log(1/0.5 - 1) + log(2)*m1 + log(2)*m2))))
```

```

#Continuous outcome affected by exposure and confounders
#Normally distributed with mean determined by formula below and s.d. 6
#Intercept of 10; mean difference of 2 for A, M1, and M2
y <- rnorm(n, mean=(10 + 2*a + 2*m1 + 2*m2), sd=6)

#Exposure with NDM
#We select 15% of the sample to have misclassified A
error <- rnorm(n) #We use "error" to determine misclassification in anticipation of dependency below
a.err <- a
  a.err <- ifelse(a==1 & error > qnorm(0.85), 0, a.err) #Set sensitivity to 0.85
  a.err <- ifelse(a==0 & error > qnorm(0.95), 1, a.err) #Set specificity to 0.95

#Induce NDM of M1 that is (1) independent of and (2) dependent with the error in exposure
m1.indep <- m1 + 0.9*runif(n, min=-1, max=1) #Mismeasured M1, independent of error in A
m1.dep <- m1 + 0.9*error #Mismeasured M1, dependent with error in A (because both depend on "error")

#Scenario 1: Linear model under no misclassification
results$delta1 <- summary(glm(y ~ a + m1 + m2, family=gaussian(link="identity")))$coefficients[2]

#Scenario 2: Linear model under NDM of binary exposure only
results$delta2 <- summary(glm(y ~ a.err + m1 + m2, family=gaussian(link="identity")))$coefficients[2]

#Scenario 3: Linear model under NDM of continuous confounder only
results$delta3 <- summary(glm(y ~ a + m1.dep + m2, family=gaussian(link="identity")))$coefficients[2]

#Scenario 4: Linear model under NDM of exposure and confounder, with independent errors
results$delta4 <- summary(glm(y ~ a.err + m1.indep + m2, family=gaussian(link="identity")))$coefficients[2]

#Scenario 5: Linear model under NDM of exposure and confounder, with dependent errors
results$delta5 <- summary(glm(y ~ a.err + m1.dep + m2, family=gaussian(link="identity")))$coefficients[2]

```

```
return(results)
}
```

```
##Run the above function "reps" times, where reps is the number of simulations
```

```
all.res <- lapply(1:reps, function(x) {simloop(x, n)})
all.res <- do.call(rbind, all.res)
```

```
# Summarize -----
```

```
#Proportion of simulations that had an error in the mean difference greater than the null
pos.error2 <- sum((all.res$delta2 - 2) > 0)/reps #Comparing scenario 2 to scenario 1
pos.error3 <- sum((all.res$delta3 - 2) > 0)/reps #Comparing scenario 3 to scenario 1
pos.error4 <- sum((all.res$delta4 - 2) > 0)/reps #Comparing scenario 4 to scenario 1
pos.error5 <- sum((all.res$delta5 - 2) > 0)/reps #Comparing scenario 5 to scenario 1
```

```
#Get the average mean difference across simulations for each scenario
```

```
summ.res <- all.res %>%
  summarise(avg.delta1=mean(delta1),
            avg.delta2=mean(delta2),
            avg.delta3=mean(delta3),
            avg.delta4=mean(delta4),
            avg.delta5=mean(delta5)) %>%
```

```
#Compute bias by comparing the average mean differences to the true mean difference of 2
```

```
mutate(bias2=avg.delta2 - 2,
       bias3=avg.delta3 - 2,
       bias4=avg.delta4 - 2,
       bias5=avg.delta5 - 2)
```

```
# Visualize -----
```

```
#Set formatting options
```

```
thm <- theme_classic() +
```

```
  theme(
```

```
    #Format text
```

```
    axis.title = element_text(family="Helvetica", size=16, color="black"),
```

```
    legend.text = element_text(family="Helvetica", size=16, color="black", margin=margin(t=0.25,b=0.25, unit="lines")),
```

```
    legend.title = element_text(family="Helvetica", size=16, color="black"),
```

```
    axis.text = element_text(family="Helvetica", size=16, color="black"),
```

```
    #Format axes
```

```
    axis.line = element_line(size=0.75),
```

```
    axis.ticks = element_line(size=0.75),
```

```
    #Format legend
```

```
    legend.title.align = 0.5,
```

```
    legend.position = c(0.85, 0.8),
```

```
    legend.background = element_rect(fill = "transparent", colour = NA),
```

```
    legend.key = element_rect(fill = "transparent", colour = NA),
```

```
    legend.direction="vertical",
```

```
    legend.box.background = element_rect(colour = "black", size=0.75),
```

```
    #Add space around plot
```

```
    plot.margin = unit(c(2, 2, 2, 2), "lines")
```

```
  )
```

```
#Compare results of Scenarios 1, 2, and 5
```

```
  #Define custom legend labels
```

```
cols<-c("None"="solid", "Exposure"="dashed", "Exposure & \nConfounder"="dotted")

pdf("./missclass_fig.pdf", height=6, width=9)
ggplot(all.res) + thm +
  #Plot labels
  labs(x="\n Mean Difference", y="Density \n") +

  #Generate plots
  stat_density(aes(delta1, linetype="None"), geom="line", size=0.75) +
  stat_density(aes(delta2, linetype="Exposure"), geom="line", size=0.75) +
  stat_density(aes(delta5, linetype="Exposure & \nConfounder"), geom="line", size=0.75) +

  #Create custom legend
  scale_linetype_manual(name="Misclassified \n Variable(s)", values=cols) +
  annotate(geom="segment", x=3.55, xend=4.63, y=0.88, yend=0.88, size=0.75, color="black") +

  #Define axis options
  scale_x_continuous(expand=c(0, 0), limits=c(-1, 5), breaks=c(-1, 0, 1, 2, 3, 4, 5)) +
  scale_y_continuous(expand=c(0,0), limits=c(0,1))
dev.off()
```

## Defining a p-value

```
#####  
#  
# Purpose: To show how simulation can be used to demonstrate the definition of a p-value  
#  
# Author: Jacqueline E. Rudolph  
#  
# Required packages: ggplot2, ggpubr  
#  
# Last Updated: 15 Oct 2020  
#  
#####  
  
##Load in necessary packages  
  
packages <- c("ggplot2", "ggpubr")  
for (package in packages) {  
  library(package, character.only=T)  
}  
  
# Run simulation -----  
  
reps <- 10000    #Number of permutations  
n <- 1000       #Number of individuals in each sample  
  
set.seed(123)  
rd <- rep(NA,reps) #Vector to hold risk difference results
```



```

#Simulate randomized treatment, with P(X=1)=0.5
x <- rbinom(n, 1, 0.5)

#Simulate binary outcome affected by treatment
#P(Y=1)=0.5 and the RD for X is 0.05
p.y <- 0.5 + 0.05*x - 0.05*0.5
y <- rbinom(n, 1, p.y)

#Estimate the RD for X and its p-value
res <- glm(y ~ x, family=gaussian(link="identity"))
rd_est <- summary(res)$coefficients[2]
rd_pvalue <- summary(res)$coefficients[8]

#Estimate the distribution of RDs under the null hypothesis that RD=0
#Randomly assign a new exposure to each individual, still with P(X'=1)=0.5
#For this new exposure, estimate the RD on the original outcome
for (i in 1:reps){
  #Draw new randomized exposure
  x_new <- rbinom(n, 1, 0.5)

  #Using new exposure and original outcome, estimate the RD and save its value in the rd vector
  rd[i] <- summary(glm(y ~ x_new, family=gaussian(link="identity")))$coefficients[2]
}

# Summarize -----

#Calculate the one-sided p-value, by taking the proportion of reps
#that had a RD greater than the RD from the original sample
prop1 <- sum(rd > rd_est)/reps

```

```
#Calculate the two-sided p-value, by taking the proportion of reps
#that had a RD more extreme than the RD from the original sample
#In other words, the absolute value of the RD was greater than the original RD
prop2 <- sum(abs(rd) > rd_est)/reps
```

```
# Visualize -----
```

```
#Set formatting options
```

```
thm <- theme_classic() +
```

```
  theme(
```

```
    #Format text
```

```
    axis.title = element_text(family="Helvetica", size=16, color="black"),
```

```
    axis.text = element_text(family="Helvetica", size=16, color="black"),
```

```
    #Use tag to label paneled plots
```

```
    plot.tag.position="topleft",
```

```
    plot.tag=element_text(family="Helvetica", size=16, color="black", margin=margin(r=10, b=20)),
```

```
    #Format axis
```

```
    axis.line = element_line(size=0.75),
```

```
    axis.ticks = element_line(size=0.75),
```

```
    #Add space around plot
```

```
    plot.margin = unit(c(1, 1, 1, 1), "lines"),
```

```
  )
```

```
#Plot one-sided p-value
```

```
p1 <- ggplot() + thm +
```

```
#Plot labels
```

```
labs(tag="A)", x="\nRisk Difference", y="Density\n") +
```

```
#Generate plots
```

```
geom_histogram(aes(rd, stat(density)), bins=36, color="gray", fill="lightgray") +  
geom_vline(xintercept=rd_est, color="black", size=0.75, linetype="dashed") +
```

```
#Define axis options
```

```
scale_x_continuous(expand=c(0, 0), limits=c(-0.12, 0.12)) +  
scale_y_continuous(expand=c(0, 0), limits=c(0, 15))
```

```
#Plot two-sided p-value
```

```
p2 <- ggplot() + thm +
```

```
labs(tag="B)", x="\nAbsolute Value of Risk Difference", y="Density\n") +  
geom_histogram(aes(abs(rd), stat(density)), bins=36, color="gray", fill="lightgray") +  
geom_vline(xintercept=rd_est, color="black", size=0.75, linetype="dashed") +  
scale_x_continuous(expand=c(0, 0), limits=c(-0.12, 0.12)) +  
scale_y_continuous(expand=c(0, 0), limits=c(0, 30))
```

```
pdf("./pvalue_fig.pdf", height=5, width=10)
```

```
ggarrange(p1, p2, ncol=2)
```

```
dev.off()
```
